# Supplementary material for: Exploring pain interference with motor skill learning in humans: A systematic review
Source: PubMed Central journal article supplement (PMC9470002; doi:10.1371/journal.pone.0274403), 2022-09-13
Supplement: pone.0274403.s004.pdf [file pone.0274403.s004.pdf]

## Search Strategy

Example of MEDLINE search;

```
(( TITLE-ABS-KEY((( pain OR nociception OR noxious OR *algia OR athralgia OR myalgia OR neuralgia OR *dynia) W/10 (interfere* OR *ffect* OR impair* OR impact* OR associat* OR imped* OR change* OR alter* OR disturb* OR influence* OR modif* OR determine* OR reduc*)))) AND (TITLE-ABS-KEY((performance OR *plasticity OR *excitability) W/10 (training OR learning OR acquisition OR practice))) AND (TITLE-ABS-KEY((performance OR *plasticity OR *excitability) W/10 (*motor OR skill OR task)))) OR ((TITLE-ABS-KEY((( pain OR nociception OR noxious OR *algia OR athralgia OR myalgia OR neuralgia OR *dynia) W/10 (interfere* OR *ffect* OR impair* OR impact* OR associat* OR imped* OR change* OR alter* OR disturb* OR influence* OR modif* OR determine* OR reduc*)))) AND ((TITLE-ABS-KEY("motor training" OR "motor learning" OR "motor acquisition" OR "motor practice" OR "Skill training" OR "Skill learning" OR "Skill acquisition" OR "Skill practice" OR "Task learning" OR "task training" OR "Task acquisition" OR "Task practice" )) OR (TITLE-ABS-KEY ("motor adaptation" OR "motor sequence learning" OR "repeated practice" ))))
```
